# Supplementary material for: Polysaccharides of Salsola passerina: Extraction, Structural Characterization and Antioxidant Activity
Source: MDPI journal article supplement (doi:10.3390/ijms232113175), 2022-10-29

## Supplementary materials

**Figure S1.**  $^1\text{H}$  spectra of the **SO1-1(a)**, **SO1-2(b)** and **SO1-3(c)**

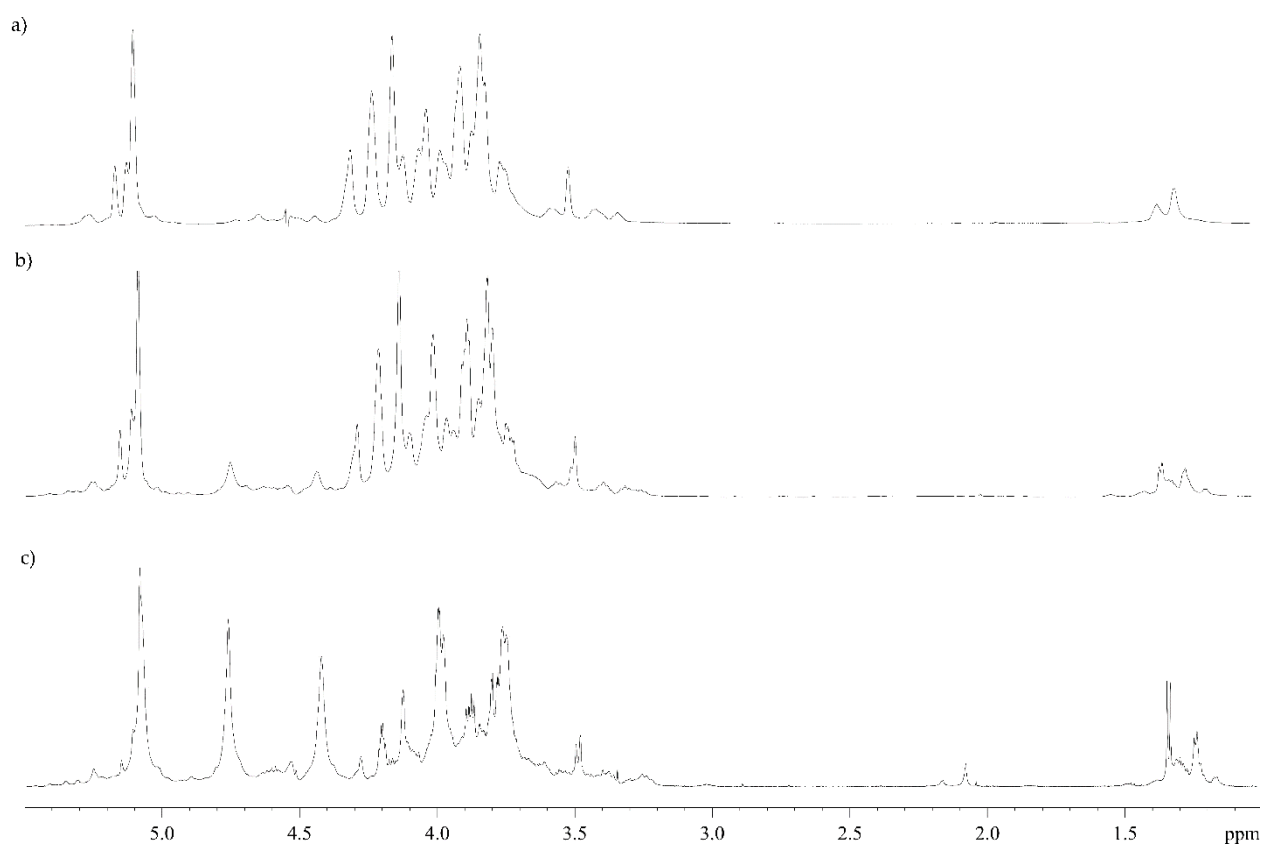

**Figure S2.** Part of  $^1\text{H}$ ,  $^{13}\text{C}$  HMBC spectrum of the **SO1-3**.

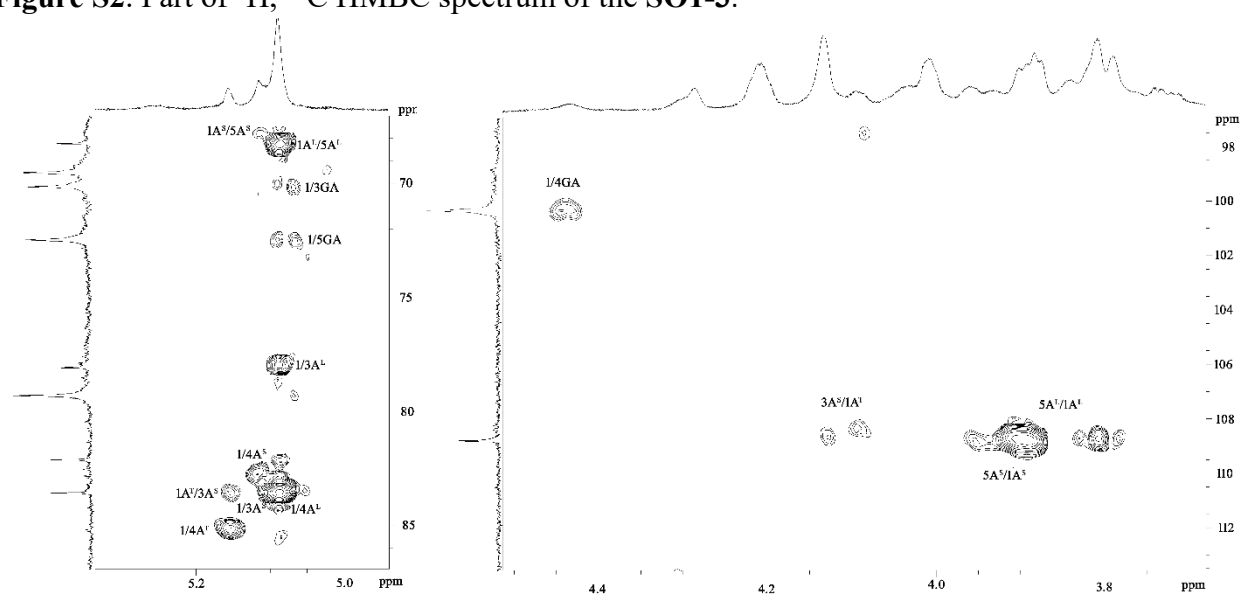

**Figure S3.** Part of  $^1\text{H}$ ,  $^1\text{H}$  ROESY spectrum of the **SO1-1**.

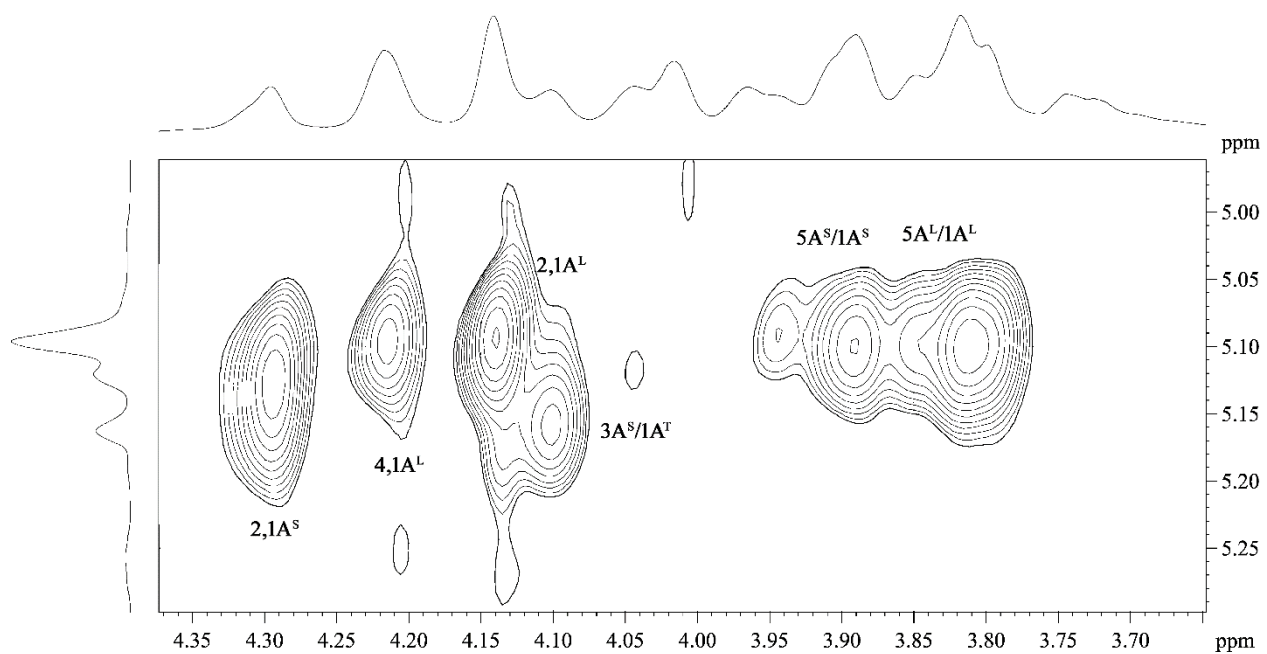

**Figure S4.** Part of  $^1\text{H}$ ,  $^1\text{H}$  ROESY spectrum of the **SO1-2**.

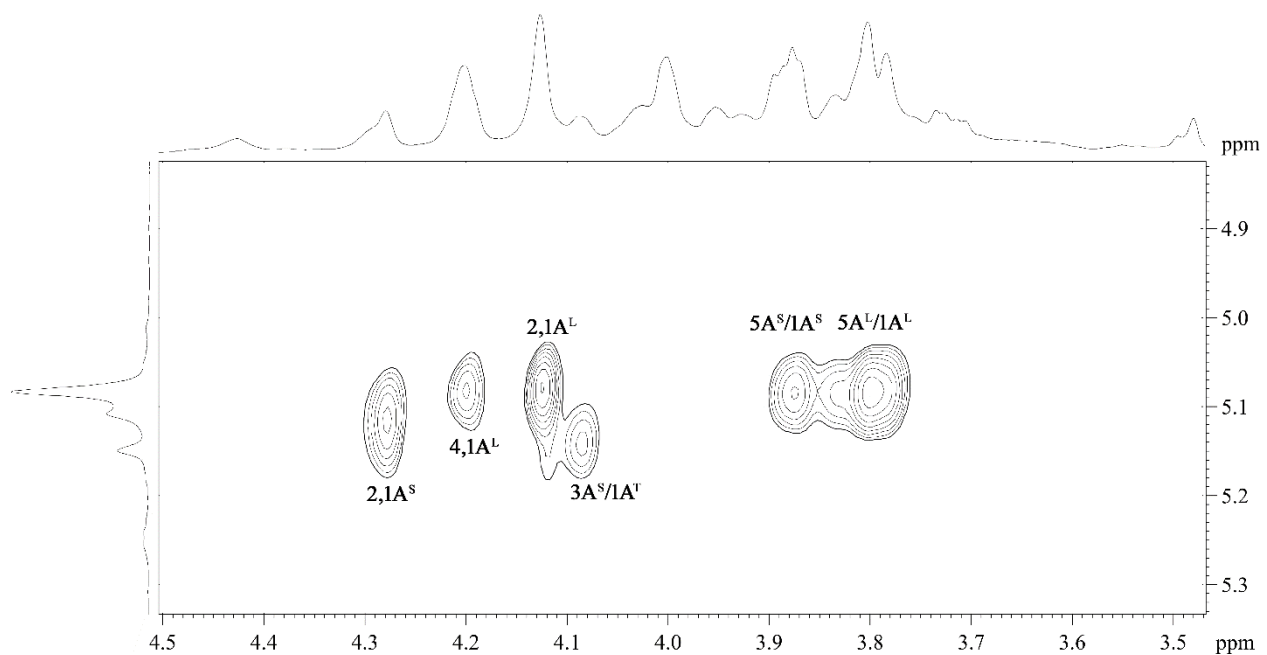

Supplement: s1 [file s1]
